# Supplementary material for: ENDORSE: a prognostic model for endocrine therapy response in advanced estrogen-receptor positive breast cancers
Source: bioRxiv or medRxiv preprint supplement (doi:10.1101/2021.02.03.21251035), 2021-11-09

Frequency across 50x10-fold cross-validations

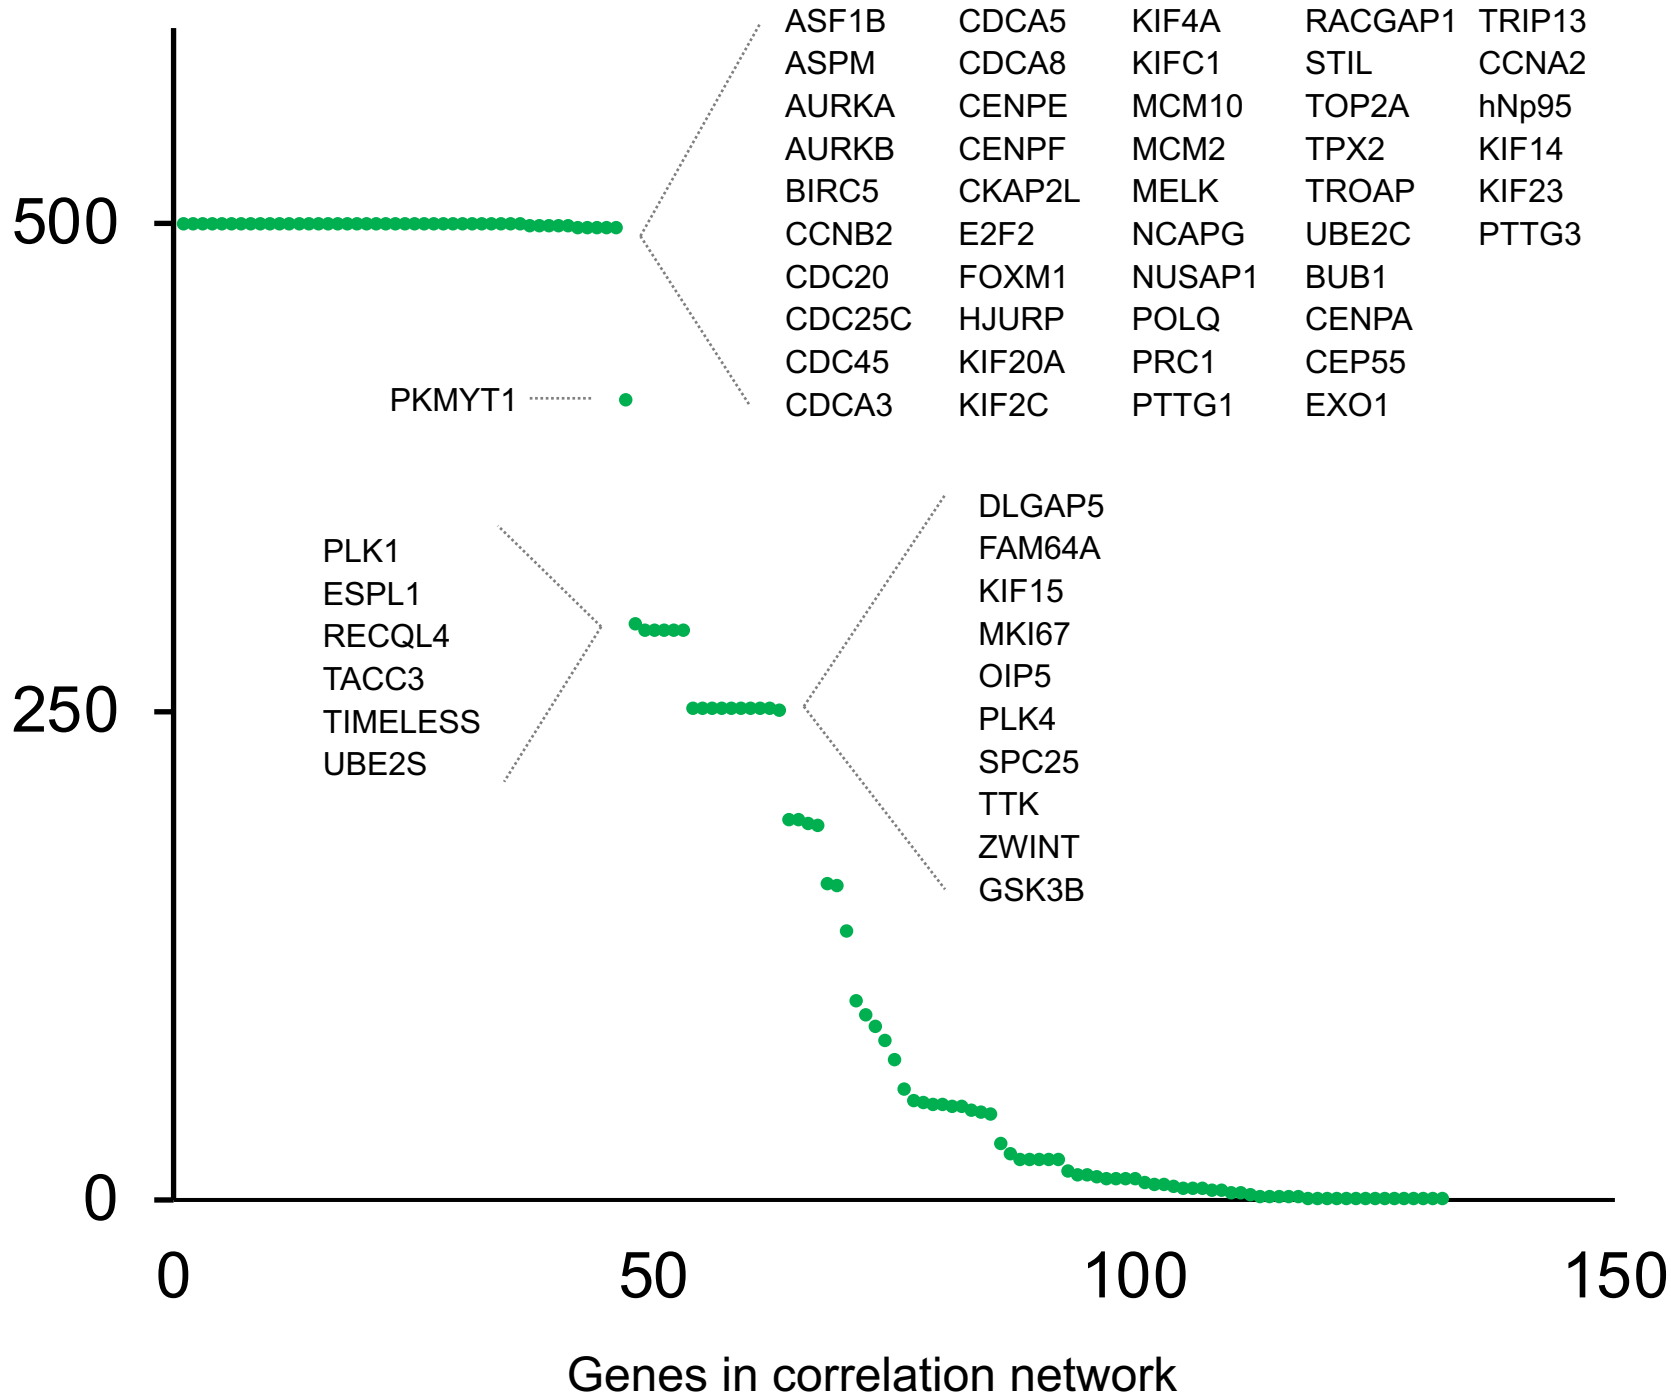

Supplement: Supplementary file [file media-1.pdf]
