# Supplementary material for: ENDORSE: a prognostic model for endocrine therapy response in advanced estrogen-receptor positive breast cancers
Source: bioRxiv or medRxiv preprint supplement (doi:10.1101/2021.02.03.21251035), 2021-11-09
Supplement: Supplementary file [file media-2.pdf]

ENDORSE Low risk Medium risk

METABRIC ER-negative (n=429)  
Log-rank test P = 0.09

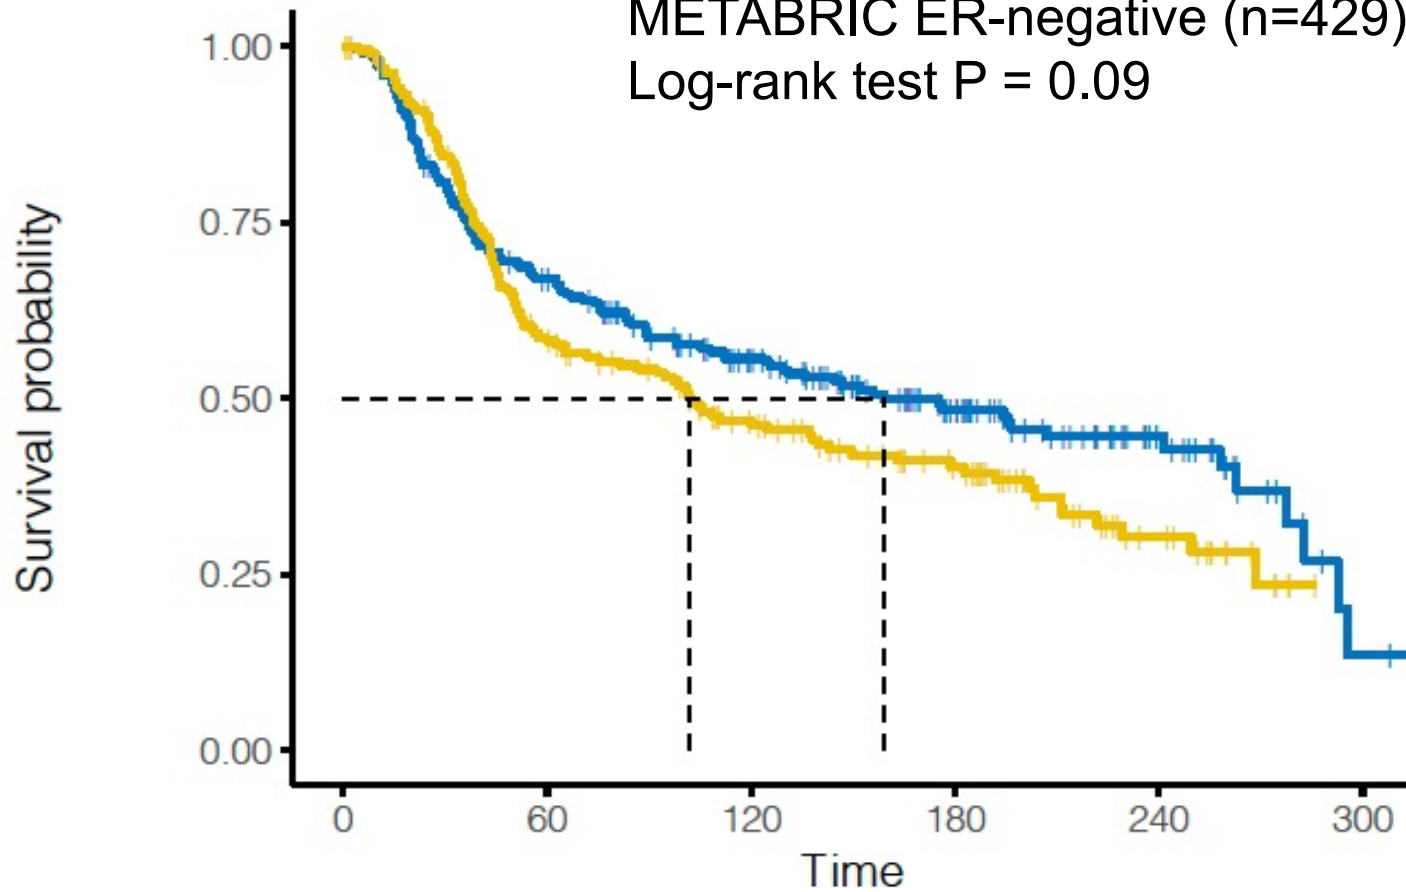

ENDORSE

Number at risk

|             | 0   | 60  | 120 | 180 | 240 | 300 |
|-------------|-----|-----|-----|-----|-----|-----|
| Low risk    | 239 | 155 | 108 | 65  | 24  | 2   |
| Medium risk | 190 | 105 | 71  | 46  | 16  | 0   |

Time
