# Supplementary material for: ENDORSE: a prognostic model for endocrine therapy response in advanced estrogen-receptor positive breast cancers
Source: bioRxiv or medRxiv preprint supplement (doi:10.1101/2021.02.03.21251035), 2021-11-09

**CBFB**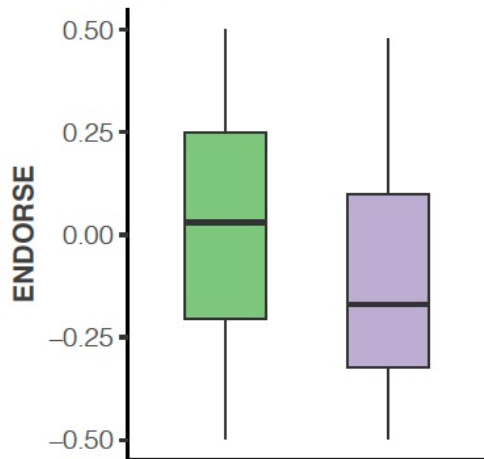**GATA3**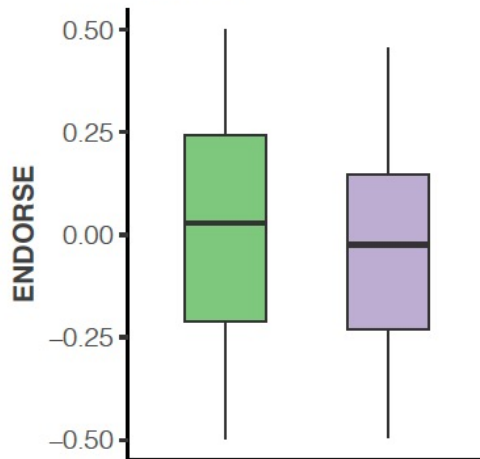**MAP3K1**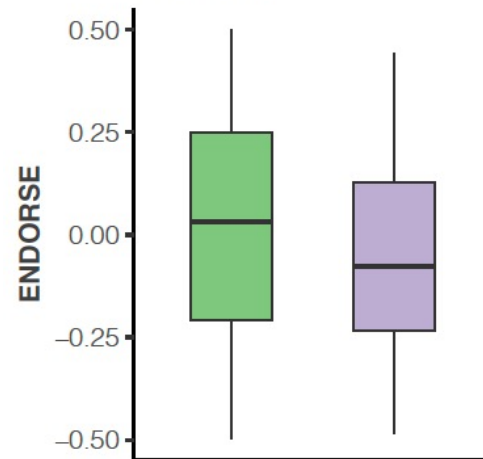**PIK3CA**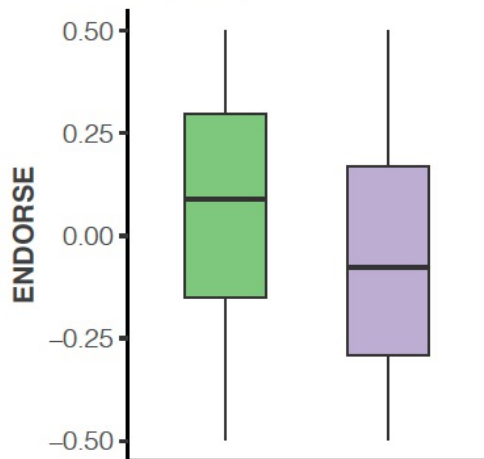**PIK3CA\_biomarker**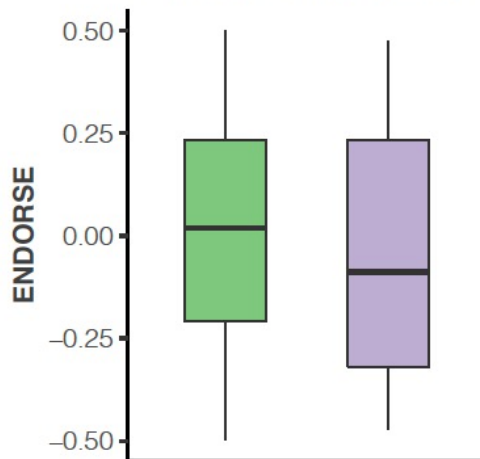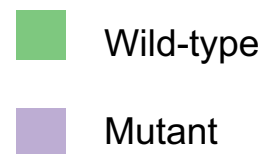

Supplement: Supplementary file [file media-3.pdf]
